# Supplementary material for: Classifying Adverse Events Following Lower Limb Orthopaedic Surgery in Children With Cerebral Palsy: Reliability of the Modified Clavien-Dindo System
Source: PubMed Central journal article supplement — J Pediatr Orthop. 2018 Aug 21;38(10):e604–9. doi: 10.1097/BPO.0000000000001233 (PMC6211781; doi:10.1097/bpo.0000000000001233), 2018-08-21
Supplement: bpo-38-e604-s002.pdf [file bpo-38-e604-s002.pdf]

# 1. Grade This Adverse Event

## Treatment and Outcome = Grade

1. Patient: Boy, 6 years, GMFCS IV Day 1 post VDROs
2. Problem: increased pain and spasm. Patient has diazepam charted, epidural and morphine infusion running
3. Treatment: Bolus of diazepam+ increase in doses to follow, epidural rate increased, bolus of morphine
4. Outcome: pain relieved, no delay in discharge

## 2. Grade This Adverse Event

Treatment and Outcome = Grade

1. Patient: 11 year old girl, Type IV hemiplegia, GMFCS II, Unilateral SEMLS
2. Problem: Skin red under Knee Immobilizer splint, from contact with metal bar
3. Treatment: Adjusted on ward by Orthotist
4. Outcome: No skin breakdown, full recovery

### 3. Grade This Adverse Event

Treatment and Outcome = Grade

1. Patient: Boy aged 8 years, GMFCS IV, dystonia. Day 21 after VDROs, spica removed because of pain and smell
2. Problem: Pressure sores, partial and full thickness
3. Treatment: admit, bd dressings
4. Nurse prone, air mattress
5. Split Skin Grafts required, under GA
6. Outcome: full recovery

## 4. Grade This Adverse Event

Treatment and Outcome = Grade

1. Patient: 5 year old girl, GMFCS V, day 1 post bilateral adductor releases and VDROs
2. Problem: vomiting, x3 episodes, in succession
3. Treatment: anti-emetics given, per charted post-op plan, by anesthetics
4. Outcome: complete resolution

## 5. Grade This Adverse Event

Treatment and Outcome = Grade

1. Patient: 14 years, boy, GMFCS V
2. Post extensive, revision adductor release
3. Problem: pain and redness over medial aspect, left knee, in abduction brace.
4. Treatment: Brace adjusted on ward, by Orthotist
5. Outcome: No skin breakdown
6. Full recovery, discharge not delayed

## 6. Grade This Adverse Event

### Treatment and Outcome = Grade

1. Patient: Boy aged 11 years, GMFCS V+PEG, Day 3 post Bilateral VDROs+ Unilateral Dega
2. Symptoms: Fever, increased respiratory rate
3. Problem: aspiration and chest infection
4. Treatment: Unplanned admission to ICU.
5. Intubated for 3 days; IV antibiotics, CPAP, chest Physiotherapy
6. Outcome: Full recovery, delayed discharge

## 7. Grade This Adverse Event

Treatment and Outcome = Grade

1. Patient: Boy aged 9, WGH Type IV hemiplegia and cavovarus foot deformity
2. Day 23 post Tib post Lengthening and Plantar Fascia Release
3. Problem: stitch abscess, noted at cast change
4. Treatment: remove suture in clinic, dressing
5. Outcome: Full recovery

## 8. Grade This Adverse Event

Treatment and Outcome = Grade

1. Patient: 12 year old girl, GMFCS II, day 1 post SEMLS
2. Problem: cough and stridor, considered to be secondary to prolonged intubation
3. Treatment: observation
4. Outcome: complete resolution



## 9. Grade This Adverse Event

### Treatment and Outcome = Grade

1. Patient: Boy aged 8 years, GMFCS V, 11 weeks after VDROs
2. Problem: Skin breakdown over great trochanter, pressure from wheelchair.
3. Treatment: Taken to operating theatre, plates removed early, skin healed with dressings
4. Outcome: No permanent sequelae, full recovery Hips enlocated, no osteomyelitis

# 10. Grade This Adverse Event

## Treatment and Outcome = Grade

1. Patient: Girl age 12 years, GMFCS II
2. Day 2 post SEMLS, VDROs, Semi T, bilateral foot reconstruction + SMOs in BK casts
3. Problem: pain, can't feel toes
4. Treatment: cast split in ward, 2 hours after Sx
5. Outcome: pain relieved, sensation returned
6. Recovery full

# 11. Grade This Adverse Event

## Treatment and Outcome = Grade

1. Patient: Boy 14 years, GMFCS III, severe crouch gait
2. Day 1 post SEMLS, SEO and PTS
3. Problem: can't feel toes, no movements
4. Treatment: Return to theatre, LL casts removed, knees flexed
5. Outcome: pain relieved, incomplete return of sensation and mild persistent weakness
6. Recovery: Incomplete recovery of sensation and movements at 12 month follow up.

## 12. Grade This Adverse Event

### Treatment and Outcome = Grade

1. Patient: Girl aged 9 years, GMFCS II, Day 7 post SEMLS, Semi T transfers and Supramalleolar Osteotomies (SMOs), distal tibiae, T plate fixation.
2. Problem: Post op x ray showed 1 screw across growth plate
3. Treatment: return to theatre on Day 3, screw changed to shorter screw, different angle
4. Outcome: healed, no growth arrest, full recovery

# 13. Grade This Adverse Event

## Treatment and Outcome = Grade

1. Patient: 9 year old boy, GMFCS V; Day 4 post bilateral VDROs, left Dega
2. Problem: pneumonia, low PO<sub>2</sub> despite antibiotics, chest physiotherapy etc.
3. No ICU bed booked
4. Treatment: Unplanned admission to ICU, tracheostomy, prolonged hospitalisation
5. Outcome: full recovery

# 14. Grade This Adverse Event

## Treatment and Outcome = Grade

1. Patient: 11 year old girl, GMFCS II, Day 2 post SEMLS
2. Problem: Unilateral block from epidural. Effective on left side. Severe pain right hip.
3. Treatment: Reviewed by Children's Pain Management Service (CPMS). Morphine and Ketamine infusions started
4. Outcome: Adequate pain relief not achieved until day 4. Then full recovery

# 15. Grade This Adverse Event

## Treatment and Outcome = Grade

1. Patient: Girl, age 7 years, GMFCS V, PEG fed. Day 5 after bilateral adductor releases.
2. Progressive increase in abdominal pain and distension.
3. Problem: Acute obstruction, surgical consult
4. Treatment: laparotomy, to free adhesions around PEG
5. Outcome: full recovery, after 2 weeks in hospital

# 16. Grade This Adverse Event

## Treatment and Outcome = Grade

1. Patient: 8 year old boy, day 2 post bilateral VDROs and bilateral Degas
2. Problem: low PO<sub>2</sub>, tachycardia, hypotensive, aspiration and lung consolidation
3. Treatment: transferred to ICU, ventilated
4. Outcome: parents requested withdrawal of ventilation Day 6. Died in ICU Day 7



# 17. Grade This Adverse Event

## Treatment and Outcome = Grade

1. Patient: 11 year old girl, GMFCS III, Day 5 post SEMLS, foot reconstruction, BK casts
2. Problem: pain over outer ankle
3. Treatment: cast windowed in ward, cast sore noted, patient too upset to co-operate with full evaluation. Returned to operating theatre. Skin red, minor skin loss, dressed and new padded cast, under GA
4. Outcome: full recovery

# 18. Grade This Adverse Event

## Treatment and Outcome = Grade

1. Patient: 8 year old girl, GMFCS V, day 2 post bilateral VDROs
2. Problem: low PO<sub>2</sub>, over sedation with diazepam
3. Treatment: Oxygen via nasal prongs, 2 doses of diazepam omitted
4. Outcome: Resolution within 24 hours

# 19. Grade This Adverse Event

## Treatment and Outcome = Grade

1. Patient: 8 year old girl, GMFCS II, SEMLS with bilateral proximal femoral osteotomies.
2. Problem: Grade 3 AVN left hip
3. Noted at 12 month follow up,
4. Mild hip pain and stiffness
5. Treatment: removal of blade plate, observation
6. Outcome: some improvement after plate removal; still has pain with prolonged activity
7. Perthes' like changes, at 24 months, with extensive healing and remodelling

## 20. Grade This Adverse Event

### Treatment and Outcome = Grade

1. Patient: 8 year old boy, Type II Hemiplegia,
2. Vulpius, Botox and casting for equinus gait
3. Problem: Returned to clinic at 1 week with heel pain
4. Treatment: Change of cast, heel red, new cast more padding
5. Outcome: Full recovery, no skin breakdown
